# Supplementary material for: COVID-19 Vaccine Acceptance, Hesitancy, and Resistancy among University Students in France
Source: MDPI journal article supplement (doi:10.3390/vaccines9060654), 2021-06-15
Supplement: s1 [file s1]

Supplementary file

Table S1. Characteristics of the university students of the study (n=3089) and of Rouen-Normandie University (N=29280)

|                                 | University students of<br>the study (n=3089) | University students of<br>Rouen-Normandie<br>University (N=29280) |
|---------------------------------|----------------------------------------------|-------------------------------------------------------------------|
| Women n (%)                     | 2206 (71.4)                                  | 17275 (59.0)                                                      |
| Year of study n (%)             |                                              |                                                                   |
| 1                               | 994 (32.2)                                   | 9370 (32.0)                                                       |
| 2 and 3                         | 1364 (44.1)                                  | 11 036 (37.6)                                                     |
| 4 and more                      | 731 (23.7)                                   | 8874 (30.3)                                                       |
| Course of study n (%)           |                                              |                                                                   |
| Healthcare                      | 1197 (38.8)                                  | 4259 (14.5)                                                       |
| Sciences                        | 588 (19.0)                                   | 6098 (20.8)                                                       |
| Neither sciences nor healthcare | 1304 (42.2)                                  | 18 923 (64.7)                                                     |
